# Supplementary material for: A QbD Approach to Design and to Optimize the Self-Emulsifying Resveratrol–Phospholipid Complex to Enhance Drug Bioavailability through Lymphatic Transport
Source: MDPI journal article supplement (doi:10.3390/polym14153220), 2022-08-08
Supplement: s1 [file s1]

## Supplementary materials

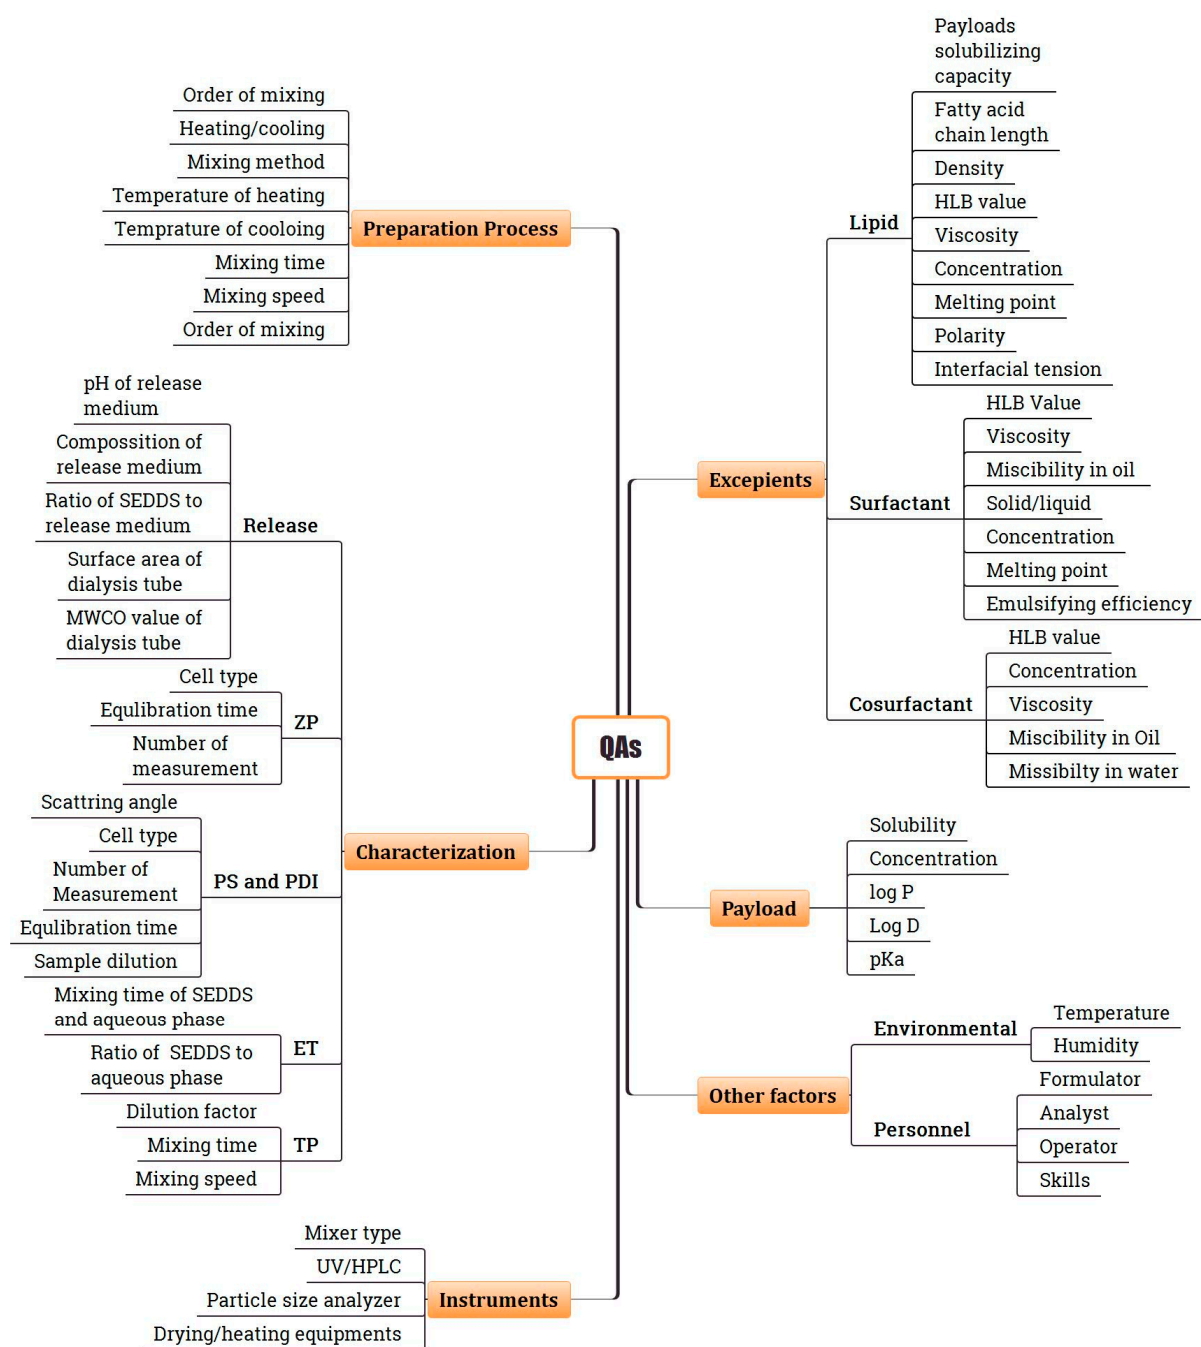

**Figure S1.** Diagram of factors affecting QAs.

Table S1. Emulsification time and transmittance percentage of different concentrations of oil, surfactant, and co-surfactant, examined in 11 different points

| Points | Emulsification time  | % Transmittance |
|--------|----------------------|-----------------|
| 1      | 6 minutes 35 seconds | 96.350          |
| 2      | 2 minutes 46 seconds | 95.670          |
| 3      | 1 minute 14 seconds  | 95.642          |
| 4      | 2 minute 8 seconds   | 94.343          |
| 5      | 1 minute 3 seconds   | 93.140          |
| 6      | 46 seconds           | 89.160          |
| 7      | 2 minutes            | 96.509          |
| 8      | 35 seconds           | 90.050          |
| 9      | 15 seconds           | 67.674          |
| 10     | 7 minutes 32 seconds | 85.120          |
| 11     | 4 minutes 38 seconds | 79.850          |

Table S2. Emulsification time and transmittance percentage data of different concentrations of TPGS were examined at 7 points.

| Points | 5% TPGS          |        | 10% TPGS      |        |
|--------|------------------|--------|---------------|--------|
|        | ET               | TP     | ET            | TP     |
| 2      | 2 min 33 seconds | 88.456 | 38 seconds    | 92.281 |
| 3      | 1 min 11 seconds | 86.312 | 38 seconds    | 95.014 |
| 4      | Not dispersed    | 84.505 | Not dispersed | 94.372 |
| 5      | 1 min 10 seconds | 88.131 | 42 seconds    | 93.103 |
| 6      | 40 seconds       | 89.217 | 24 seconds    | 91.176 |
| 7      | Not dispersed    | 89.148 | Not dispersed | 96.513 |
| 8      | 2 min 45 seconds | 88.383 | 47 seconds    | 90.046 |

Table S3. The polynomial model fitting summary of CQA responses.

| CQA responses        | The best-fitted polynomial model | Fit summery        |                |                         |                          |                                                                |                    |
|----------------------|----------------------------------|--------------------|----------------|-------------------------|--------------------------|----------------------------------------------------------------|--------------------|
|                      |                                  | Sequential p-value | R <sup>2</sup> | Adjusted R <sup>2</sup> | Predicted R <sup>2</sup> | Adjusted R <sup>2</sup> to Predicted R <sup>2</sup> difference | Adequate Precision |
| Y <sub>ET</sub>      | Cubic                            | 0.0006             | 0.9991         | 0.9965                  | 0.9686                   | 0.0279                                                         | 22.83              |
| Y <sub>GS</sub>      | Sp. Quartic vs. Quadratic        | 0.0345             | 0.9870         | 0.9609                  | 0.8721                   | 0.0888                                                         | 26.43              |
| Y <sub>PDI</sub>     | Cubic                            | 0.0056             | 0.9931         | 0.9723                  | 0.9024                   | 0.0699                                                         | 67.9               |
| Y <sub>Release</sub> | Cubic                            | 0.0005             | 0.9987         | 0.9946                  | 0.9815                   | 0.0131                                                         | 59.53              |

Table S4. The optimization criteria of CMAs and CQAs responses.

| CMAs                              | Notation             | Goal     | Limit range | Importance |
|-----------------------------------|----------------------|----------|-------------|------------|
| Labrafil® M 1944 CS concentration | X <sub>1</sub>       | Maximize | 0.1 – 0.3   | +++++      |
| Kolliphor® RH 40 concentration    | X <sub>2</sub>       | In range | 0.4 – 0.6   | +++        |
| Transcutol® HP concentration      | X <sub>3</sub>       | Minimize | 0.3 – 0.4   | +++++      |
| CQAs responses                    |                      |          |             |            |
| Globule size (GS)                 | Y <sub>GS</sub>      | In range | 10 – 30 nm  | +++        |
| Polydispersity index (PDI)        | Y <sub>PDI</sub>     | Minimize | 0 – 0.2     | +++        |
| Emulsification time (ET)          | Y <sub>ET</sub>      | In range | 1 – 60 sec  | +++        |
| Release                           | Y <sub>Release</sub> | In range | 80 – 100%   | +++        |

Table S5. The verification points were shown as the weight ratio of oil, surfactant, and co-surfactant. Alongside, the CQA responses of the verification runs with their predicted mean and 95% prediction intervals were also shown.

| Weight ratio of Labrafil® 1944 CS, Kolliphor® RH40, and Transcutol® HP | CQA response         | Predicted mean | Actual | 95% PI low | 95% PI high |
|------------------------------------------------------------------------|----------------------|----------------|--------|------------|-------------|
| <b>VR1</b><br>Ratio (0.225029, 0.415328, 0.359643)                     | Y <sub>ET</sub>      | 23.117         | 21.67  | 15.4463    | 30.7877     |
|                                                                        | Y <sub>GS</sub>      | 21.3637        | 22.07  | 18.5315    | 24.196      |
|                                                                        | Y <sub>PDI</sub>     | 0.162309       | 0.148  | 0.130284   | 0.194334    |
|                                                                        | Y <sub>Release</sub> | 82.9224        | 83.93  | 80.8606    | 84.9842     |
| <b>VR2</b><br>Ratio (0.1875, 0.4375, 0.375)                            | Y <sub>ET</sub>      | 23.941         | 22.63  | 14.6357    | 33.2463     |
|                                                                        | Y <sub>GS</sub>      | 18.9608        | 21.88  | 15.3844    | 22.5371     |
|                                                                        | Y <sub>PDI</sub>     | 0.124196       | 0.097  | 0.0837577  | 0.164634    |
|                                                                        | Y <sub>Release</sub> | 92.4581        | 90.28  | 89.8546    | 95.0616     |
| <b>VR3</b><br>Ratio (0.117018, 0.512281, 0.370701)                     | Y <sub>ET</sub>      | 30.697         | 28.97  | 21.3968    | 39.9973     |
|                                                                        | Y <sub>GS</sub>      | 17.5576        | 20.03  | 13.9491    | 21.1661     |
|                                                                        | Y <sub>PDI</sub>     | 0.191211       | 0.148  | 0.150409   | 0.232013    |
|                                                                        | Y <sub>Release</sub> | 91.9037        | 93.58  | 89.2768    | 94.5306     |
| <b>VR4</b><br>Ratio (0.167778, 0.437319, 0.394903)                     | Y <sub>ET</sub>      | 23.6608        | 26.68  | 14.1414    | 33.1802     |
|                                                                        | Y <sub>GS</sub>      | 21.5204        | 23.57  | 18.2895    | 24.7512     |
|                                                                        | Y <sub>PDI</sub>     | 0.183661       | 0.196  | 0.147129   | 0.220193    |
|                                                                        | Y <sub>Release</sub> | 92.1088        | 90.17  | 89.7568    | 94.4608     |

|                                                      |                      |          |       |          |          |
|------------------------------------------------------|----------------------|----------|-------|----------|----------|
|                                                      |                      |          |       |          |          |
| <b>VR5</b><br>Ratio (0.2375, 0.4375,<br>0.325)       | Y <sub>ET</sub>      | 29.3715  | 34.78 | 20.0466  | 38.6965  |
|                                                      | Y <sub>GS</sub>      | 35.1401  | 32.47 | 30.4895  | 39.7908  |
|                                                      | Y <sub>PDI</sub>     | 0.482679 | 0.416 | 0.430094 | 0.535265 |
|                                                      | Y <sub>Release</sub> | 74.013   | 76.19 | 70.6274  | 77.3985  |
|                                                      |                      |          |       |          |          |
| <b>VR6</b><br>Ratio (0.1375, 0.5375,<br>0.325)       | Y <sub>ET</sub>      | 55.439   | 58.17 | 47.7479  | 63.1301  |
|                                                      | Y <sub>GS</sub>      | 29.5001  | 29.02 | 25.2521  | 33.7482  |
|                                                      | Y <sub>PDI</sub>     | 0.50567  | 0.487 | 0.457636 | 0.553704 |
|                                                      | Y <sub>Release</sub> | 74.5334  | 76.18 | 71.441   | 77.6259  |
|                                                      |                      |          |       |          |          |
| <b>VR7</b><br>Ratio (0.1375, 0.4875,<br>0.375)       | Y <sub>ET</sub>      | 34.4499  | 36.01 | 26.7826  | 42.1172  |
|                                                      | Y <sub>GS</sub>      | 16.8158  | 18.86 | 13.7813  | 19.8502  |
|                                                      | Y <sub>PDI</sub>     | 0.131284 | 0.158 | 0.096973 | 0.165595 |
|                                                      | Y <sub>Release</sub> | 93.5607  | 90.29 | 91.3517  | 95.7697  |
|                                                      |                      |          |       |          |          |
| <b>VR8</b><br>Ratio (0.16655, 0.466395,<br>0.367055) | Y <sub>ET</sub>      | 33.1813  | 37.67 | 26.6106  | 39.752   |
|                                                      | Y <sub>GS</sub>      | 19.664   | 21.24 | 16.9449  | 22.3832  |
|                                                      | Y <sub>PDI</sub>     | 0.170305 | 0.196 | 0.139559 | 0.201051 |
|                                                      | Y <sub>Release</sub> | 91.6925  | 93.09 | 89.713   | 93.6719  |
